# Supplementary material for: The FMRP/GRK4 mRNA interaction uncovers a new mode of binding of the Fragile X mental retardation protein in cerebellum
Source: PubMed Central journal article supplement — Nucleic Acids Res. 2015 Aug 6;43(17):8540–50. doi: 10.1093/nar/gkv801 (PMC4787806; doi:10.1093/nar/gkv801), 2015-08-06
Supplement: supp_gkv801_nar-00108-a-2015-File009.pdf [file supp_gkv801_nar-00108-a-2015-File009.pdf]

## LEGENDS TO THE SUPPLEMENTARY FIGURES

### Supplementary Figure 1

Immunoprecipitation for CLIP from cerebellum extracts obtained from wild-type or *Fmr1*-null mice using the polyclonal anti-FMRP R60 antibody. After immunoprecipitation, as described in Materials and Methods, 1/10 of each extract was loaded on a 11% polyacrylamide denaturing gel and Western blot was performed using the 1C3 monoclonal anti-FMRP antibody. As shown in this figure, we revealed FMRP at 75 kDa and RNA/FMRP complex at 95 kDa only in wild-type animals, while no FMRP was detected in cerebellar extracts obtained from *Fmr1* knock-out mice, indicating the specificity of this antibody. The IgG heavy chains are indicated at 50 kDa.

### Supplementary Figure 2

A. Cation-dependent termination of reverse transcription in N19 (positive control) and  $\Delta 35$  (negative control). All purines of the G-quadruplex structure harboured by the N19 fragment (derived from FMR1) are indicated in red (G) and blue (A), respectively. The  $\Delta 35$  probe was generated by deleting 35 nucleotides corresponding to the fragment included between positions 1613 and 1648 of the *FMR1* ISO1 isoform [16,23]. For N19, the two strongest pauses of reverse transcriptase in the presence of  $K^+$  are indicated by arrowheads. Three minor pauses are observable in the presence of  $K^+$ . All pauses are not present in the  $\Delta 35$  fragment.

B. Cation-dependent termination of reverse transcription in the *Cod2A* fragment of the *GRK4* mRNA using two different primers in order to completely cover the Cod2 fragment. No pauses are observed in the presence of  $K^+$ ,  $Na^+$  or  $Li^+$ , demonstrating the absence of G-quadruplex-forming structures in this RNA fragment bound by FMRP.

### Supplementary Figure 3

10% PAGE gel showing the running of retro transcribed G4RIF; RNA after treatment with DMS, CMCT, RNaseA, T1 or V1.

Supplementary Figure 4.

QuShape analysis of the G4RIF A modified G4RIF RNA harboring a complementary sequence to M13rev primer at its' 3'end was PAGE purified and its structure was analysed by CMCT and DMS. Processed RNA were reverse transcribed with VIC-labeled M13rev primers, and the reactivities were compared to mock - treated RNA. Sequence alignment was achieved by resolving in the same capillary two dideoxy-nucleotide sequencing reactions (NED and PET labelled M13rev primers) and one cDNA from mock- or chemical-treated RNA reaction. Reactivities for CMCT- (A) or DMS-treated (B) samples were computed with the QuShape software. A 5'-3' oriented sequence is displayed at the bottom of each graph. The deduced secondary structure in (C) is numbered according to the two graphs.

**Fig. S1**

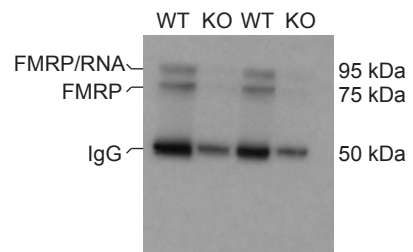

Fig. S2

**A**

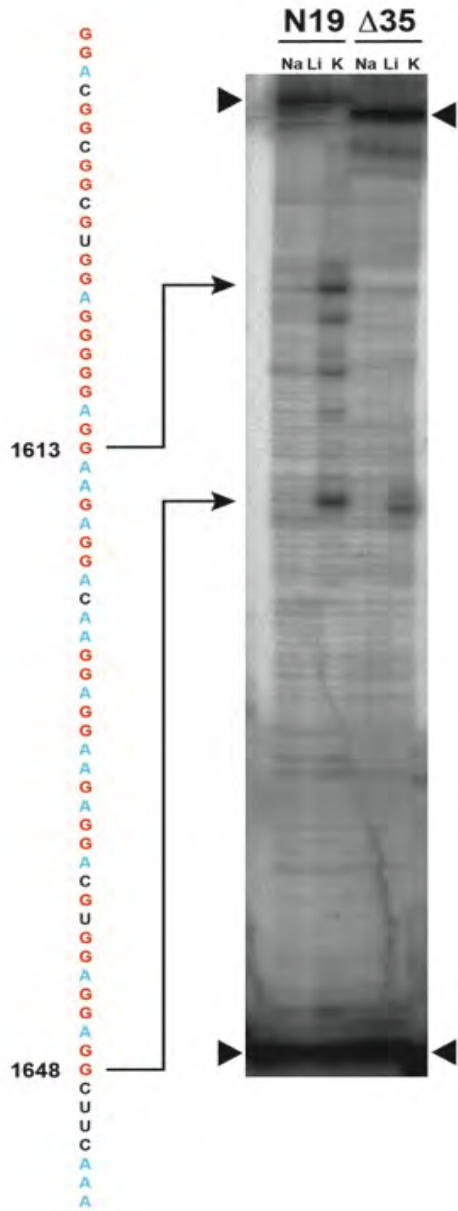

**B**

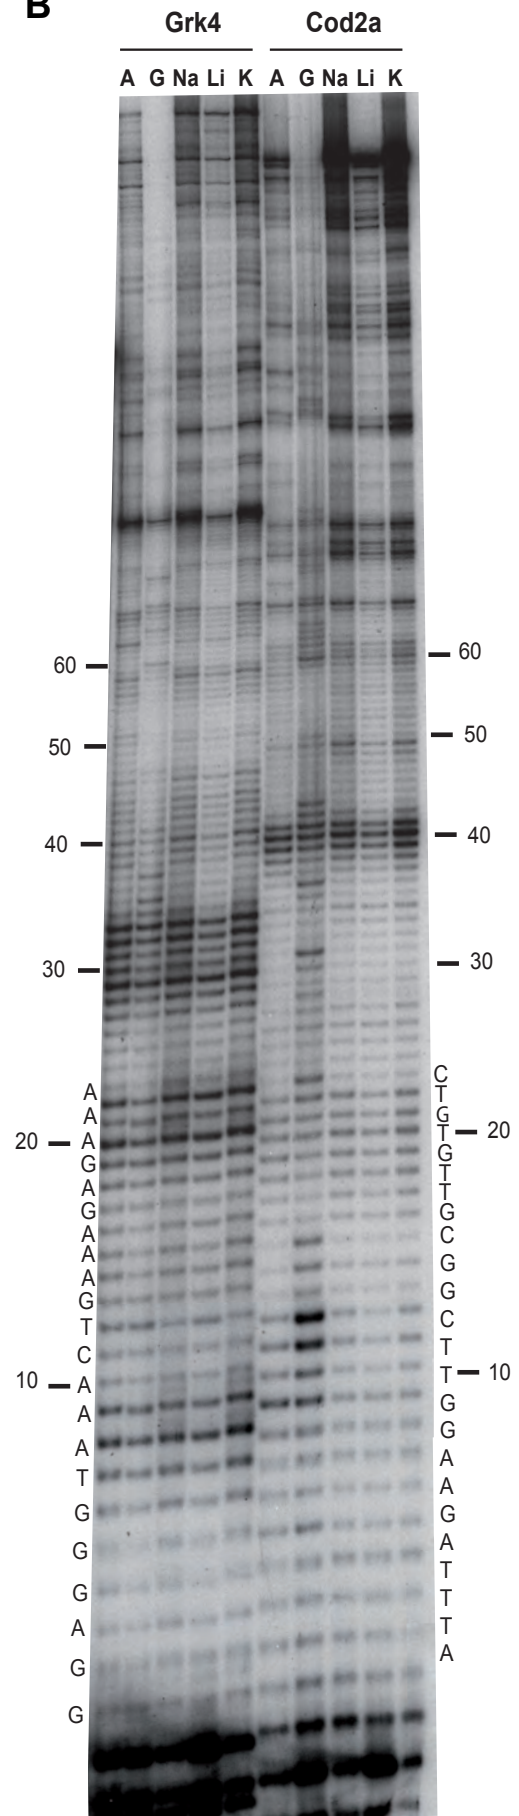

Fig. S3

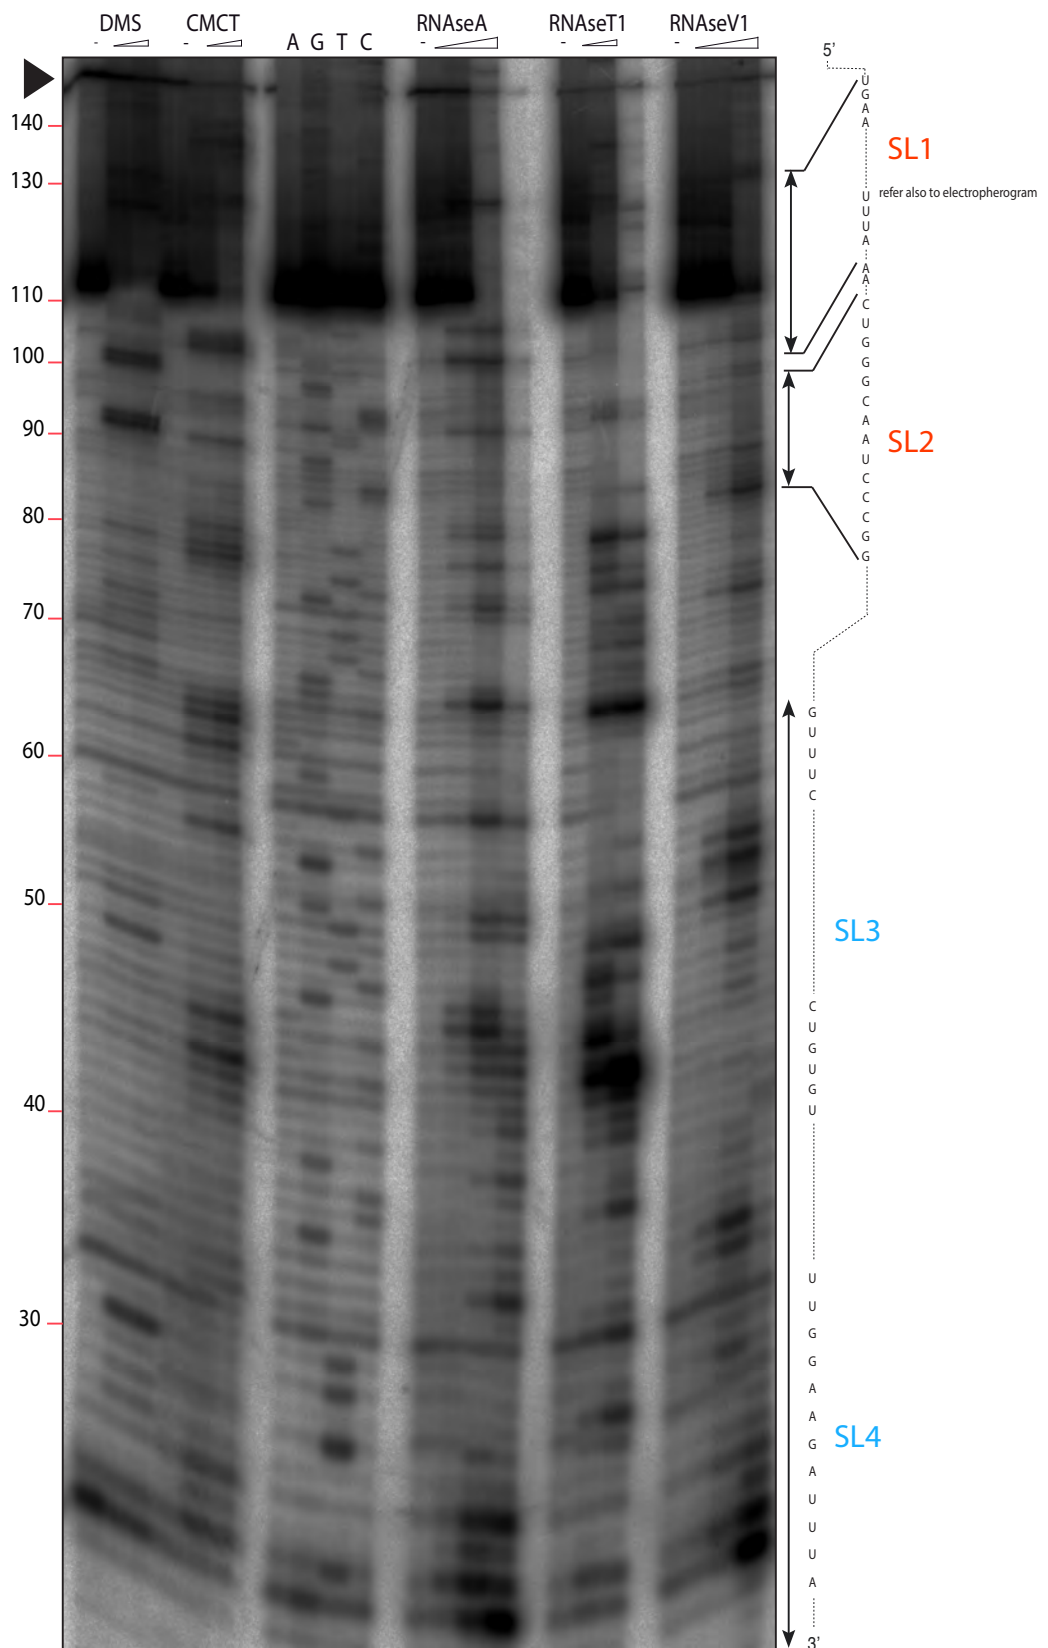

Fig. S4

A

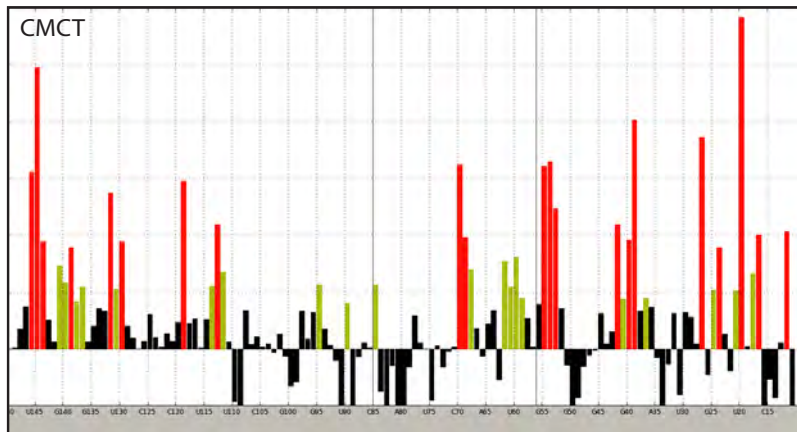

B

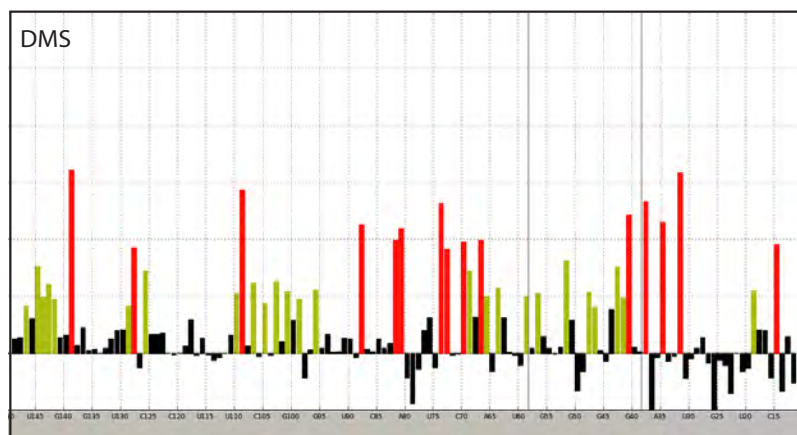

C

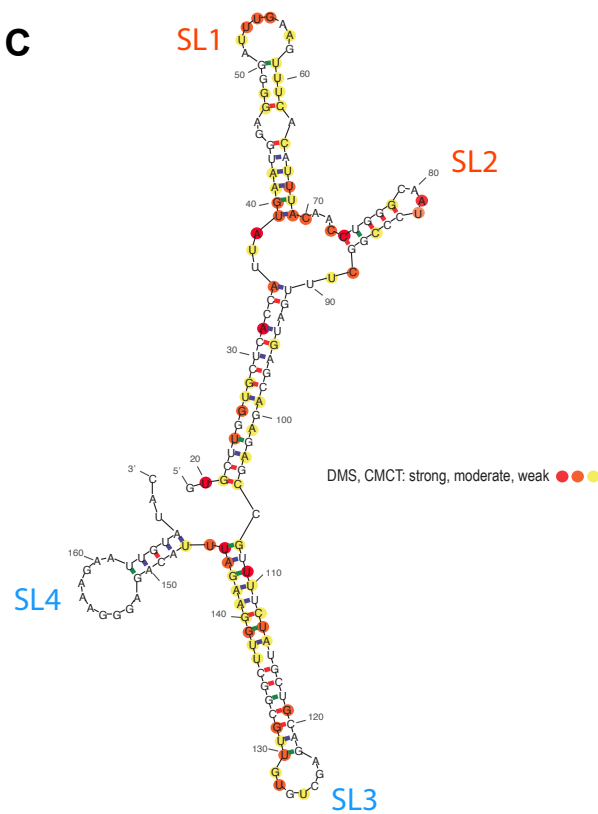

| seqNum | seqRNA | area_BSA | area_FMRP | areaDiff | normDiff | centered 20-mer bin | binned -average |
|--------|--------|----------|-----------|----------|----------|---------------------|-----------------|
| 9      | A      | 2002,32  | 2101,93   | -99,66   | -0,06    |                     |                 |
| 10     | A      | 2088,77  | 2634,94   | -546,17  | -0,33    |                     |                 |
| 11     | A      | 289,92   | 1555,44   | -1265,52 | -0,77    |                     |                 |
| 12     | G      | 0        | 332,23    | -332,23  | -0,2     |                     |                 |
| 13     | G      | 1147,43  | 841,54    | 305,89   | 0,18     | average 20-mer bin  | 6,250153846     |
| 14     | G      | 365,37   | 247,63    | 117,74   | 0,07     |                     |                 |
| 15     | A      | 528,79   | 299,57    | 229,22   | 0,14     |                     |                 |
| 16     | G      | 702,16   | 464,42    | 237,74   | 0,14     |                     |                 |
| 17     | A      | 1250,05  | 1176,41   | 73,64    | 0,04     | 4,47                | -1,780153846    |
| 18     | C      | 16154,08 | 13102,32  | 3051,76  | 1,85     | 4,65                | -1,600153846    |
| 19     | A      | 18964,55 | 17419,59  | 1544,96  | 0,93     | 4,99                | -1,260153846    |
| 20     | U      | 2137,22  | 1608,92   | 528,3    | 0,32     | 5,96                | -0,290153846    |
| 21     | U      | 310,02   | 261,89    | 48,12    | 0,03     | 6,38                | 0,129846154     |
| 22     | U      | 780,9    | 577,27    | 203,63   | 0,12     | 7,12                | 0,869846154     |
| 23     | A      | 4522,33  | 3367,79   | 1154,54  | 0,7      | 7,17                | 0,919846154     |
| 24     | G      | 1416,17  | 1297,52   | 118,65   | 0,07     | 7,82                | 1,569846154     |
| 25     | A      | 7117,32  | 6849,2    | 268,12   | 0,16     | 7,86                | 1,609846154     |
| 26     | A      | 5988,2   | 5119,16   | 869,04   | 0,53     | 7,56                | 1,309846154     |
| 27     | G      | 5171,33  | 4274,95   | 896,37   | 0,54     | 6,12                | -0,130153846    |
| 28     | G      | 1518,79  | 1504,67   | 14,12    | 0,01     | 5,38                | -0,870153846    |
| 29     | U      | 401,1    | 196,92    | 204,18   | 0,12     | 5,27                | -0,980153846    |
| 30     | U      | 426,69   | 403,18    | 23,51    | 0,01     | 5,17                | -1,080153846    |
| 31     | C      | 1619,2   | 1287,23   | 331,97   | 0,2      | 5,08                | -1,170153846    |
| 32     | G      | 1474,71  | 1114,99   | 359,72   | 0,22     | 4,38                | -1,870153846    |
| 33     | G      | 8789,24  | 7262,47   | 1526,77  | 0,92     | 4,27                | -1,980153846    |
| 34     | C      | 3217,25  | 3019,65   | 197,6    | 0,12     | 4,08                | -2,170153846    |
| 35     | G      | 7611,35  | 6307,57   | 1303,78  | 0,79     | 3,42                | -2,830153846    |
| 36     | U      | 1780,16  | 1481,13   | 299,03   | 0,18     | 4,6                 | -1,650153846    |
| 37     | U      | 2489,54  | 2916,39   | -426,85  | -0,26    | 4,51                | -1,740153846    |
| 38     | G      | 3724,65  | 3040,14   | 684,51   | 0,41     | 4,23                | -2,020153846    |
| 39     | U      | 1060,66  | 749,16    | 311,5    | 0,19     | 4,55                | -1,700153846    |
| 40     | G      | 1676,95  | 1330,78   | 346,17   | 0,21     | 4,26                | -1,990153846    |
| 41     | U      | 434,17   | 541,91    | -107,74  | -0,07    | 4,29                | -1,960153846    |
| 42     | C      | 266,92   | 209,71    | 57,21    | 0,03     | 3,9                 | -2,350153846    |
| 43     | G      | 29,58    | 26,3      | 3,28     | 0        | 4,5                 | -1,750153846    |
| 44     | A      | 1013,69  | 1076,22   | -62,52   | -0,04    | 4,4                 | -1,850153846    |
| 45     | G      | 891,9    | 938,59    | -46,69   | -0,03    | 5,42                | -0,830153846    |
| 46     | A      | 1584,12  | 1798,47   | -214,34  | -0,13    | 5,77                | -0,480153846    |
| 47     | C      | 9191,61  | 6352,81   | 2838,8   | 1,72     | 6,29                | 0,039846154     |
| 48     | G      | 1631,18  | 1769,3    | -138,12  | -0,08    | 6,43                | 0,179846154     |
| 49     | U      | 1907,69  | 2170,61   | -262,92  | -0,16    | 6,31                | 0,059846154     |
| 50     | C      | 2400,45  | 1851,1    | 549,35   | 0,33     | 6,35                | 0,099846154     |
| 51     | G      | 369,02   | 509,73    | -140,7   | -0,09    | 6,27                | 0,019846154     |
| 52     | U      | 1557,46  | 1140,41   | 417,05   | 0,25     | 6,14                | -0,110153846    |
| 53     | A      | 4311,49  | 3435,51   | 875,98   | 0,53     | 5,83                | -0,420153846    |
| 54     | U      | 7105,32  | 5911,04   | 1194,28  | 0,72     | 5,82                | -0,430153846    |
| 55     | C      | 4476,19  | 3341,03   | 1135,16  | 0,69     | 6,18                | -0,070153846    |

|       |          |          |          |       |       |              |
|-------|----------|----------|----------|-------|-------|--------------|
| 56 U  | 8754,08  | 6764,31  | 1989,76  | 1,2   | 4,46  | -1,790153846 |
| 57 U  | 5233,54  | 5082,85  | 150,69   | 0,09  | 4,58  | -1,670153846 |
| 58 U  | 7727,95  | 6196,82  | 1531,13  | 0,93  | 6,8   | 0,549846154  |
| 59 U  | 700,41   | 149,61   | 550,79   | 0,33  | 6,68  | 0,429846154  |
| 60 G  | 1780,27  | 1623,9   | 156,38   | 0,09  | 6,89  | 0,639846154  |
| 61 C  | 552,58   | 606,01   | -53,43   | -0,03 | 7,31  | 1,059846154  |
| 62 C  | 264,08   | 350,71   | -86,63   | -0,05 | 6,99  | 0,739846154  |
| 63 G  | 816,51   | 1033,47  | -216,96  | -0,13 | 6,34  | 0,089846154  |
| 64 A  | 607,76   | 1182,72  | -574,95  | -0,35 | 5,68  | -0,570153846 |
| 65 G  | 2748,77  | 2820,28  | -71,51   | -0,04 | 4,45  | -1,800153846 |
| 66 A  | 2743,26  | 2365,64  | 377,62   | 0,23  | 3,67  | -2,580153846 |
| 67 G  | 3308,18  | 3303,73  | 4,45     | 0     | 4,84  | -1,410153846 |
| 68 A  | 3924,22  | 3856,38  | 67,84    | 0,04  | 4,8   | -1,450153846 |
| 69 C  | 10190,87 | 6790,16  | 3400,71  | 2,06  | 4,93  | -1,320153846 |
| 70 G  | 1124,53  | 774,35   | 350,18   | 0,21  | 4,91  | -1,340153846 |
| 71 A  | 1298,96  | 1099,75  | 199,21   | 0,12  | 5,75  | -0,500153846 |
| 72 G  | 3680,16  | 2577,86  | 1102,3   | 0,67  | 5,87  | -0,380153846 |
| 73 U  | 1429,57  | 1083,12  | 346,46   | 0,21  | 5,8   | -0,450153846 |
| 74 A  | 721,65   | 606,68   | 114,97   | 0,07  | 5,79  | -0,460153846 |
| 75 G  | 479,98   | 433,77   | 46,22    | 0,03  | 5,8   | -0,450153846 |
| 76 U  | 3932,71  | 3984,23  | -51,53   | -0,03 | 5,75  | -0,500153846 |
| 77 U  | 4114,83  | 5250,67  | -1135,84 | -0,69 | 5,82  | -0,430153846 |
| 78 U  | 13952,1  | 10478,46 | 3473,64  | 2,1   | 4,23  | -2,020153846 |
| 79 C  | 1251,31  | 771,61   | 479,7    | 0,29  | 4,07  | -2,180153846 |
| 80 G  | 1747,7   | 1388,48  | 359,22   | 0,22  | 3,99  | -2,260153846 |
| 81 G  | 694,97   | 772,25   | -77,27   | -0,05 | 3,33  | -2,920153846 |
| 82 C  | 3137,82  | 1838,38  | 1299,44  | 0,79  | 3,01  | -3,240153846 |
| 83 C  | 0        | 21,37    | -21,37   | -0,01 | 3,05  | -3,200153846 |
| 84 C  | 1258,28  | 1945,95  | -687,68  | -0,42 | 3,11  | -3,140153846 |
| 85 U  | 4382,74  | 4460,57  | -77,83   | -0,05 | 3,28  | -2,970153846 |
| 86 A  | 1374,24  | 972,72   | 401,51   | 0,24  | 6,14  | -0,110153846 |
| 87 A  | 2556,01  | 2643,83  | -87,83   | -0,05 | 5,16  | -1,090153846 |
| 88 C  | 3217,55  | 3040,61  | 176,94   | 0,11  | 6,06  | -0,190153846 |
| 89 G  | 3368,55  | 2592,44  | 776,11   | 0,47  | 5,79  | -0,460153846 |
| 90 G  | 775,19   | 699,52   | 75,67    | 0,05  | 6,25  | -0,000153846 |
| 91 G  | 99,23    | 31,91    | 67,33    | 0,04  | 5,88  | -0,370153846 |
| 92 U  | 30,69    | 15,5     | 15,2     | 0,01  | 6,38  | 0,129846154  |
| 93 C  | 1656,16  | 1832,54  | -176,38  | -0,11 | 6,94  | 0,689846154  |
| 94 C  | 1725,86  | 1550,13  | 175,73   | 0,11  | 7,93  | 1,679846154  |
| 95 A  | 682,16   | 540,15   | 142      | 0,09  | 8,61  | 2,359846154  |
| 96 A  | 536,01   | 297,72   | 238,3    | 0,14  | 9,14  | 2,889846154  |
| 97 C  | 10380,42 | 6800,37  | 3580,05  | 2,17  | 9,44  | 3,189846154  |
| 98 A  | 6702,46  | 4844,76  | 1857,7   | 1,12  | 9,28  | 3,029846154  |
| 99 U  | 5080,31  | 3112,07  | 1968,24  | 1,19  | 9,4   | 3,149846154  |
| 100 U | 77,44    | 163,79   | -86,35   | -0,05 | 9,98  | 3,729846154  |
| 101 U | 4598,25  | 3925,57  | 672,68   | 0,41  | 11,71 | 5,459846154  |
| 102 A | 4061,84  | 3372,54  | 689,3    | 0,42  | 13,64 | 7,389846154  |
| 103 C | 3862,75  | 3044,55  | 818,19   | 0,49  | 14,77 | 8,519846154  |



|       |          |          |         |       |       |              |
|-------|----------|----------|---------|-------|-------|--------------|
| 104 A | 1786,91  | 1552,22  | 234,69  | 0,14  | 14,66 | 8,409846154  |
| 105 C | 4896,44  | 3348,11  | 1548,33 | 0,94  | 14,27 | 8,019846154  |
| 106 U | 4738,5   | 3215,47  | 1523,03 | 0,92  | 11,87 | 5,619846154  |
| 107 U | 5199,33  | 4407,53  | 791,8   | 0,48  | 10,66 | 4,409846154  |
| 108 U | 4002,25  | 3331,82  | 670,43  | 0,41  | 9,42  | 3,169846154  |
| 109 G | 2224,53  | 1709,39  | 515,15  | 0,31  | 9,49  | 3,239846154  |
| 110 A | 683,42   | 402,5    | 280,92  | 0,17  | 9,27  | 3,019846154  |
| 111 A | 2439,6   | 1417,5   | 1022,1  | 0,62  | 8,83  | 2,579846154  |
| 112 G | 8468,82  | 5598,64  | 2870,18 | 1,74  | 8,34  | 2,089846154  |
| 113 U | 10127,62 | 7119,77  | 3007,85 | 1,82  | 7,76  | 1,509846154  |
| 114 U | 7189,33  | 5138,29  | 2051,04 | 1,24  | 7,49  | 1,239846154  |
| 115 U | 2245     | 2284,7   | -39,7   | -0,02 | 6,72  | 0,469846154  |
| 116 A | 453,52   | 874,28   | -420,76 | -0,25 | 6,97  | 0,719846154  |
| 117 G | 1531,7   | 1910,18  | -378,48 | -0,23 | 7,5   | 1,249846154  |
| 118 G | 949,28   | 1093,81  | -144,53 | -0,09 | 7,72  | 1,469846154  |
| 119 G | 213,41   | 300,25   | -86,83  | -0,05 | 8     | 1,749846154  |
| 120 G | 316,51   | 278,08   | 38,43   | 0,02  | 8,09  | 1,839846154  |
| 121 A | 2658,1   | 2344,5   | 313,59  | 0,19  | 6,71  | 0,459846154  |
| 122 G | 483,42   | 509,69   | -26,28  | -0,02 | 4,9   | -1,350153846 |
| 123 G | 677,3    | 676,75   | 0,55    | 0     | 3,68  | -2,570153846 |
| 124 U | 958,65   | 1687,71  | -729,05 | -0,44 | 3,62  | -2,630153846 |
| 125 A | 7851,43  | 6739,99  | 1111,43 | 0,67  | 3,77  | -2,480153846 |
| 126 A | 3223,61  | 2976,27  | 247,34  | 0,15  | 4,29  | -1,960153846 |
| 127 G | 8459,56  | 7258,51  | 1201,05 | 0,73  | 4,23  | -2,020153846 |
| 128 U | 11111,96 | 9550,17  | 1561,79 | 0,94  | 4,53  | -1,720153846 |
| 129 A | 2951,63  | 2077,41  | 874,22  | 0,53  | 4,64  | -1,610153846 |
| 130 U | 2209,17  | 1457,42  | 751,75  | 0,45  | 4,67  | -1,580153846 |
| 131 U | 8398,57  | 7218,42  | 1180,15 | 0,71  | 4,87  | -1,380153846 |
| 132 A | 3493,94  | 2897,93  | 596,01  | 0,36  | 4,96  | -1,290153846 |
| 133 C | 648,3    | 634,41   | 13,89   | 0,01  | 6,28  | 0,029846154  |
| 134 C | 646,92   | 622,08   | 24,84   | 0,02  | 5,74  | -0,510153846 |
| 135 A | 2106,5   | 2241,83  | -135,34 | -0,08 | 6,08  | -0,170153846 |
| 136 C | 24,9     | 190,42   | -165,53 | -0,1  | 6,18  | -0,070153846 |
| 137 U | 2714,78  | 2233,63  | 481,15  | 0,29  | 5,64  | -0,610153846 |
| 138 C | 1482,02  | 1730,79  | -248,77 | -0,15 | 5,33  | -0,920153846 |
| 139 G | 1060,67  | 640,07   | 420,59  | 0,25  | 5,83  | -0,420153846 |
| 140 U | 2254,55  | 2040,91  | 213,64  | 0,13  | 6,33  | 0,079846154  |
| 141 G | 1319,91  | 950,84   | 369,07  | 0,22  | 6,28  | 0,029846154  |
| 142 G | 424,02   | 127,88   | 296,13  | 0,18  | 6,25  | -0,000153846 |
| 143 U | 769,39   | 617,92   | 151,47  | 0,09  | 5,92  | -0,330153846 |
| 144 U | 10764    | 9303,5   | 1460,5  | 0,88  | 5,77  | -0,480153846 |
| 145 C | 4277,97  | 4066,6   | 211,37  | 0,13  | 5,82  | -0,430153846 |
| 146 G | 3808,17  | 2993     | 815,16  | 0,49  | 5,46  | -0,790153846 |
| 147 U | 6755,31  | 5389,67  | 1365,64 | 0,83  |       |              |
| 148 G | 3320,67  | 2662,11  | 658,56  | 0,4   |       |              |
| 149 U | 1226,89  | 862,81   | 364,08  | 0,22  |       |              |
| 150 U | 4917,26  | 3339,76  | 1577,51 | 0,95  |       |              |
| 151 C | 13890,65 | 11897,54 | 1993,11 | 1,21  |       |              |

|       |         |         |         |       |
|-------|---------|---------|---------|-------|
| 152 C | 2197,49 | 1681,44 | 516,06  | 0,31  |
| 153 G | 2731,73 | 2771,61 | -39,89  | -0,02 |
| 154 U | 3680,92 | 4192,47 | -511,55 | -0,31 |
| 155 A | 187,25  | 566,01  | -378,76 | -0,23 |
| 156 G | 32,54   | 107,45  | -74,91  | -0,05 |
| 157 A | 260,84  | 368,84  | -107,99 | -0,07 |
| 158 A | 1923,71 | 1439,49 | 484,22  | 0,29  |
| 159 A | 5037,28 | 4629,08 | 408,2   | 0,25  |
